# Supplementary material for: Synthesis of near-infrared fluorescent, elongated ring-like Ag2Se colloidal nanoassemblies
Source: Royal Society of Chemistry journal article supplement (doi:10.1039/c4ra00613e), 2014-01-01
Supplement: c4ra00613e1.pdf [file c4ra00613e1.pdf]

## Supporting Information

Synthesis of Near-Infrared Fluorescent, Elongated Ring-Like

Ag<sub>2</sub>Se Colloidal Nanoassembly

*Qi Cao<sup>1</sup> and Renchao Che<sup>1, 2</sup> \**

*<sup>1</sup> Laboratory of Advanced Materials, Fudan University, Shanghai 200438, People's  
Republic of China*

*<sup>2</sup> Department of Materials Science, Fudan University, Shanghai 200433, People's Republic  
of China*

● Corresponding author: [rcche2008@gmail.com](mailto:rcche2008@gmail.com)

This file contains:

Supporting figures S1 - S6.

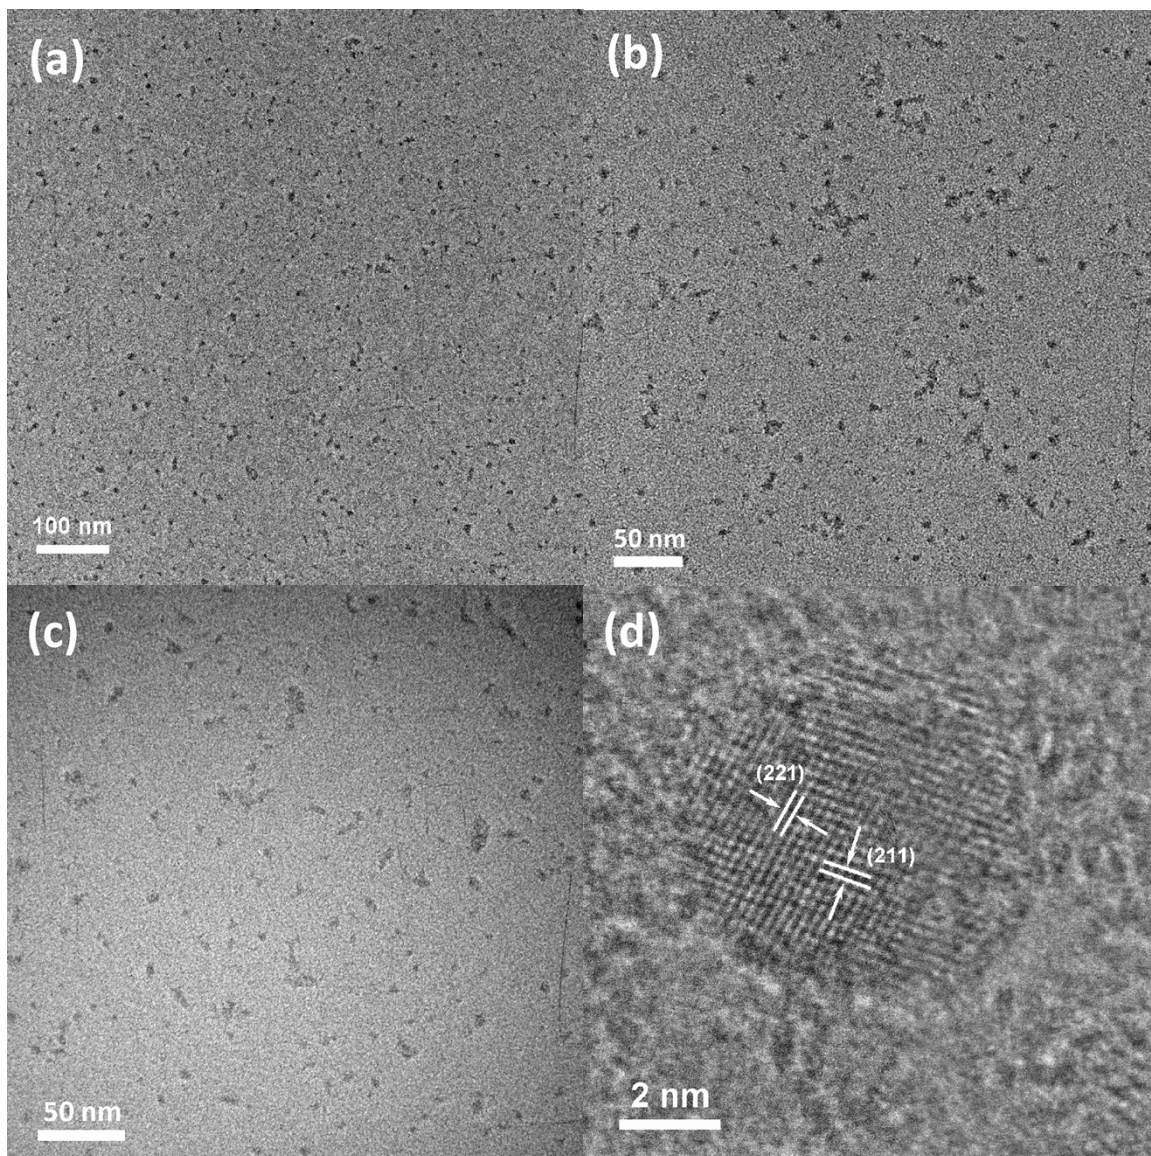

**Fig. S1** (a-c) TEM images of the 2-MPA capped  $\text{Ag}_2\text{Se}$  nanocrystals obtained with (a) 15 min, (b) 1 h and (c) 5 h of the reaction time; (d) HRTEM image of the synthesized 2-MPA capped  $\text{Ag}_2\text{Se}$  nanocrystals obtained at 15 min.

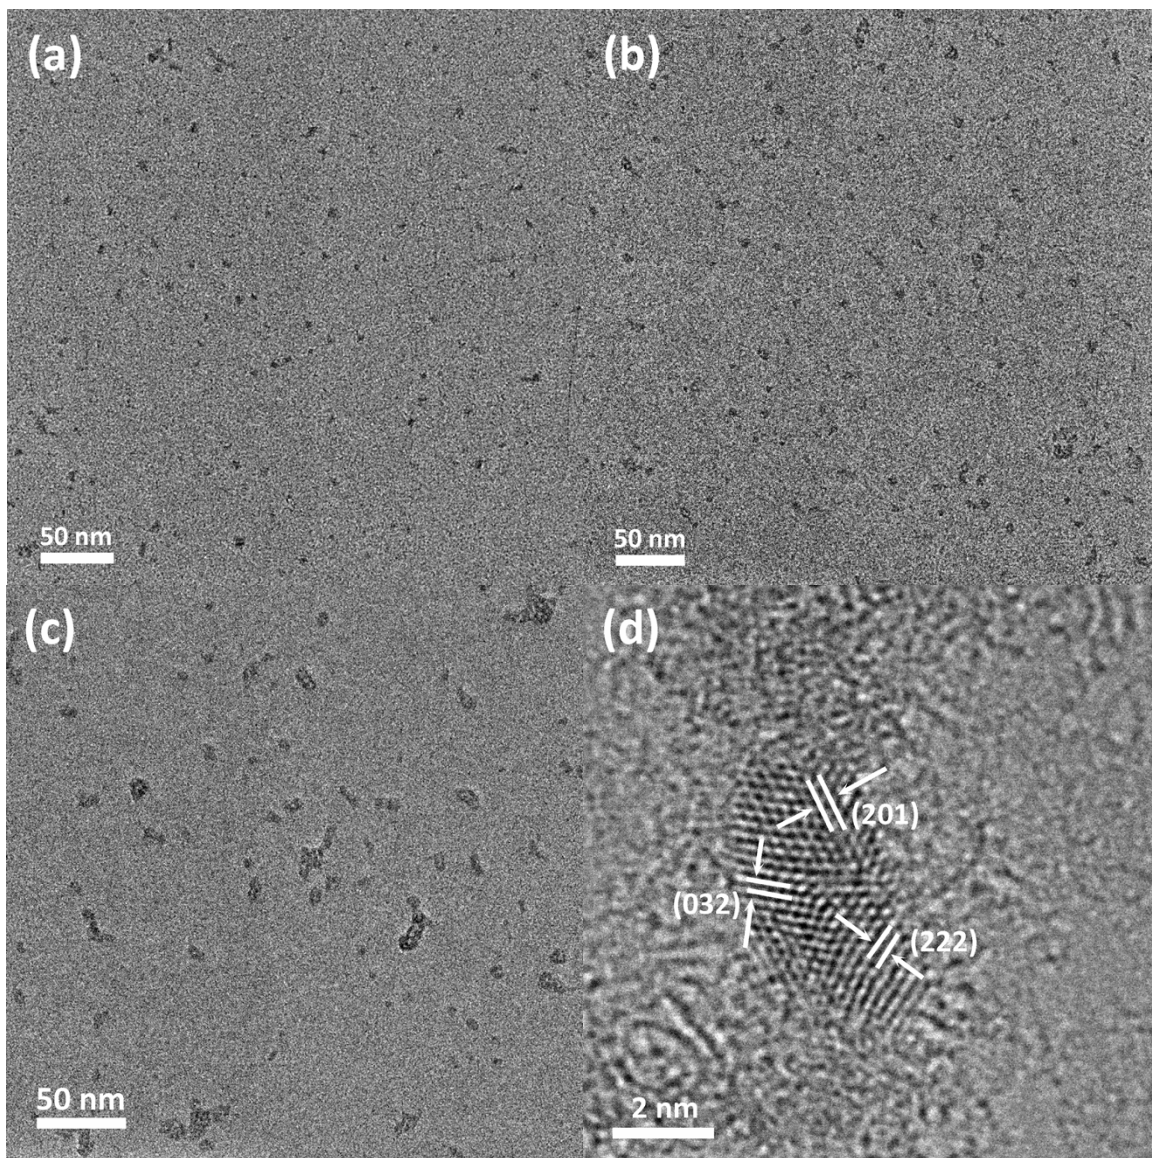

**Fig. S2** (a-c) TEM images of the TGA capped Ag<sub>2</sub>Se nanocrystals obtained with (a) 15 min, (b) 1 h and (c) 5 h of the reaction time; (d) HRTEM image of the synthesized TGA capped Ag<sub>2</sub>Se nanocrystals obtained at 15 min.

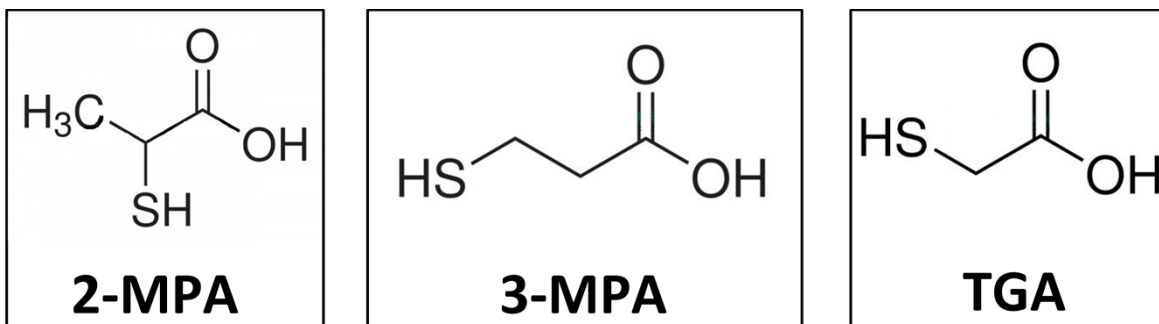

**Fig. S3** Chemical structures of the capping molecules 3-MPA, 2-MPA and TGA used in this work.

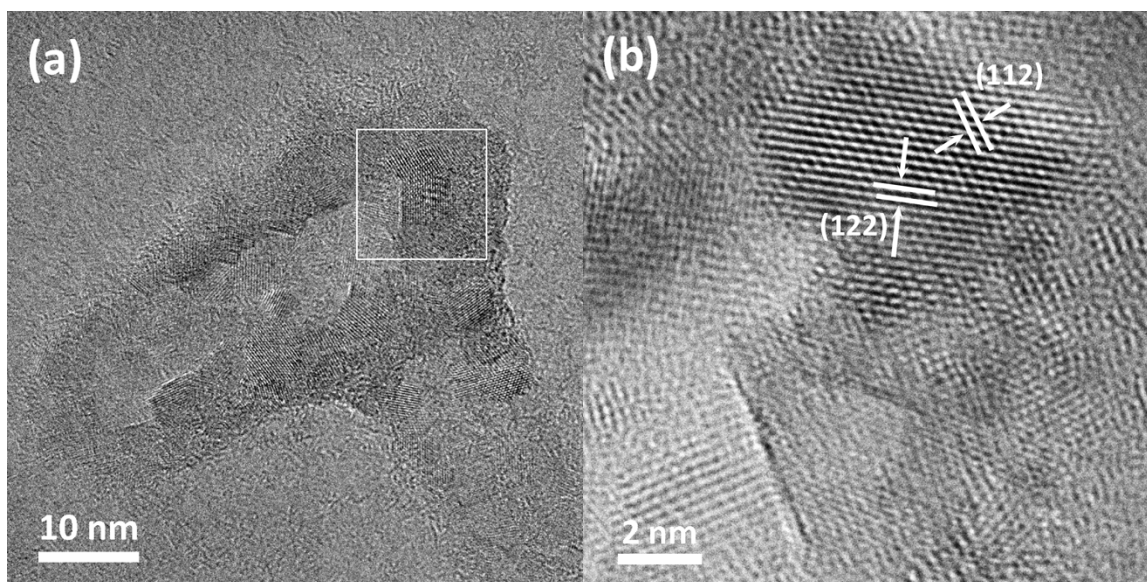

**Fig. S4** Representative (a) TEM and (b) HRTEM images of the ER-like  $\text{Ag}_2\text{Se}$  NAs with 15 min of the reaction time while have not been washed by ethanol afterwards.



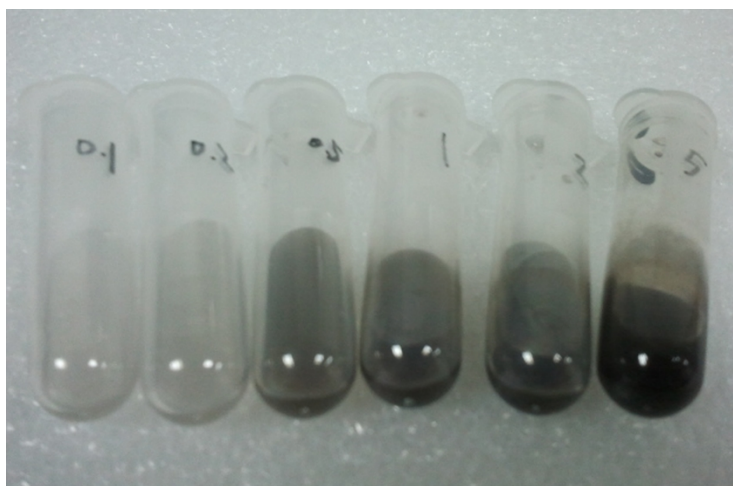

**Fig. S5** A photograph of the water dispersed  $\text{Ag}_2\text{Se}$  ER-like NAs with different concentrations. From left to right: 0.1 mg/mL, 0.2 mg/mL, 0.5 mg/mL, 1 mg/mL, 2 mg/mL and 5 mg/mL, respectively. All these dispersions have been placed at room temperature for 2 h upon preparation.

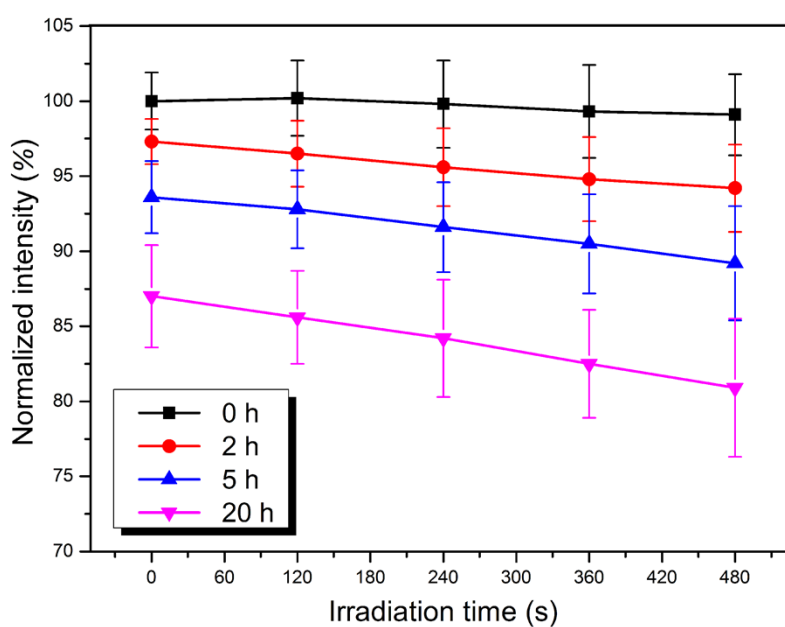

**Fig. S6** The normalized fluorescent intensity *versus* irradiation time of the synthesized  $\text{Ag}_2\text{Se}$  ER-like NAs dispersed in water (10 mg/L) upon preparation (■) and 2 h (●), 5 h (▲), 20 h (▼) after preparation. All the spectra were recorded using a 808 nm laser as the excitation source.
